# Supplementary material for: Low back pain prevalence and risk factors among health workers in Saudi Arabia: A systematic review and meta‐analysis
Source: PubMed Central journal article supplement (PMC7382437; doi:10.1002/1348-9585.12155), 2020-07-25
Supplement: JOH2-62-e12155-s001.pdf [file JOH2-62-e12155-s001.pdf]

**Supplemental Figure 1.** Week prevalence of low back pain among health professionals in Saudi Arabia

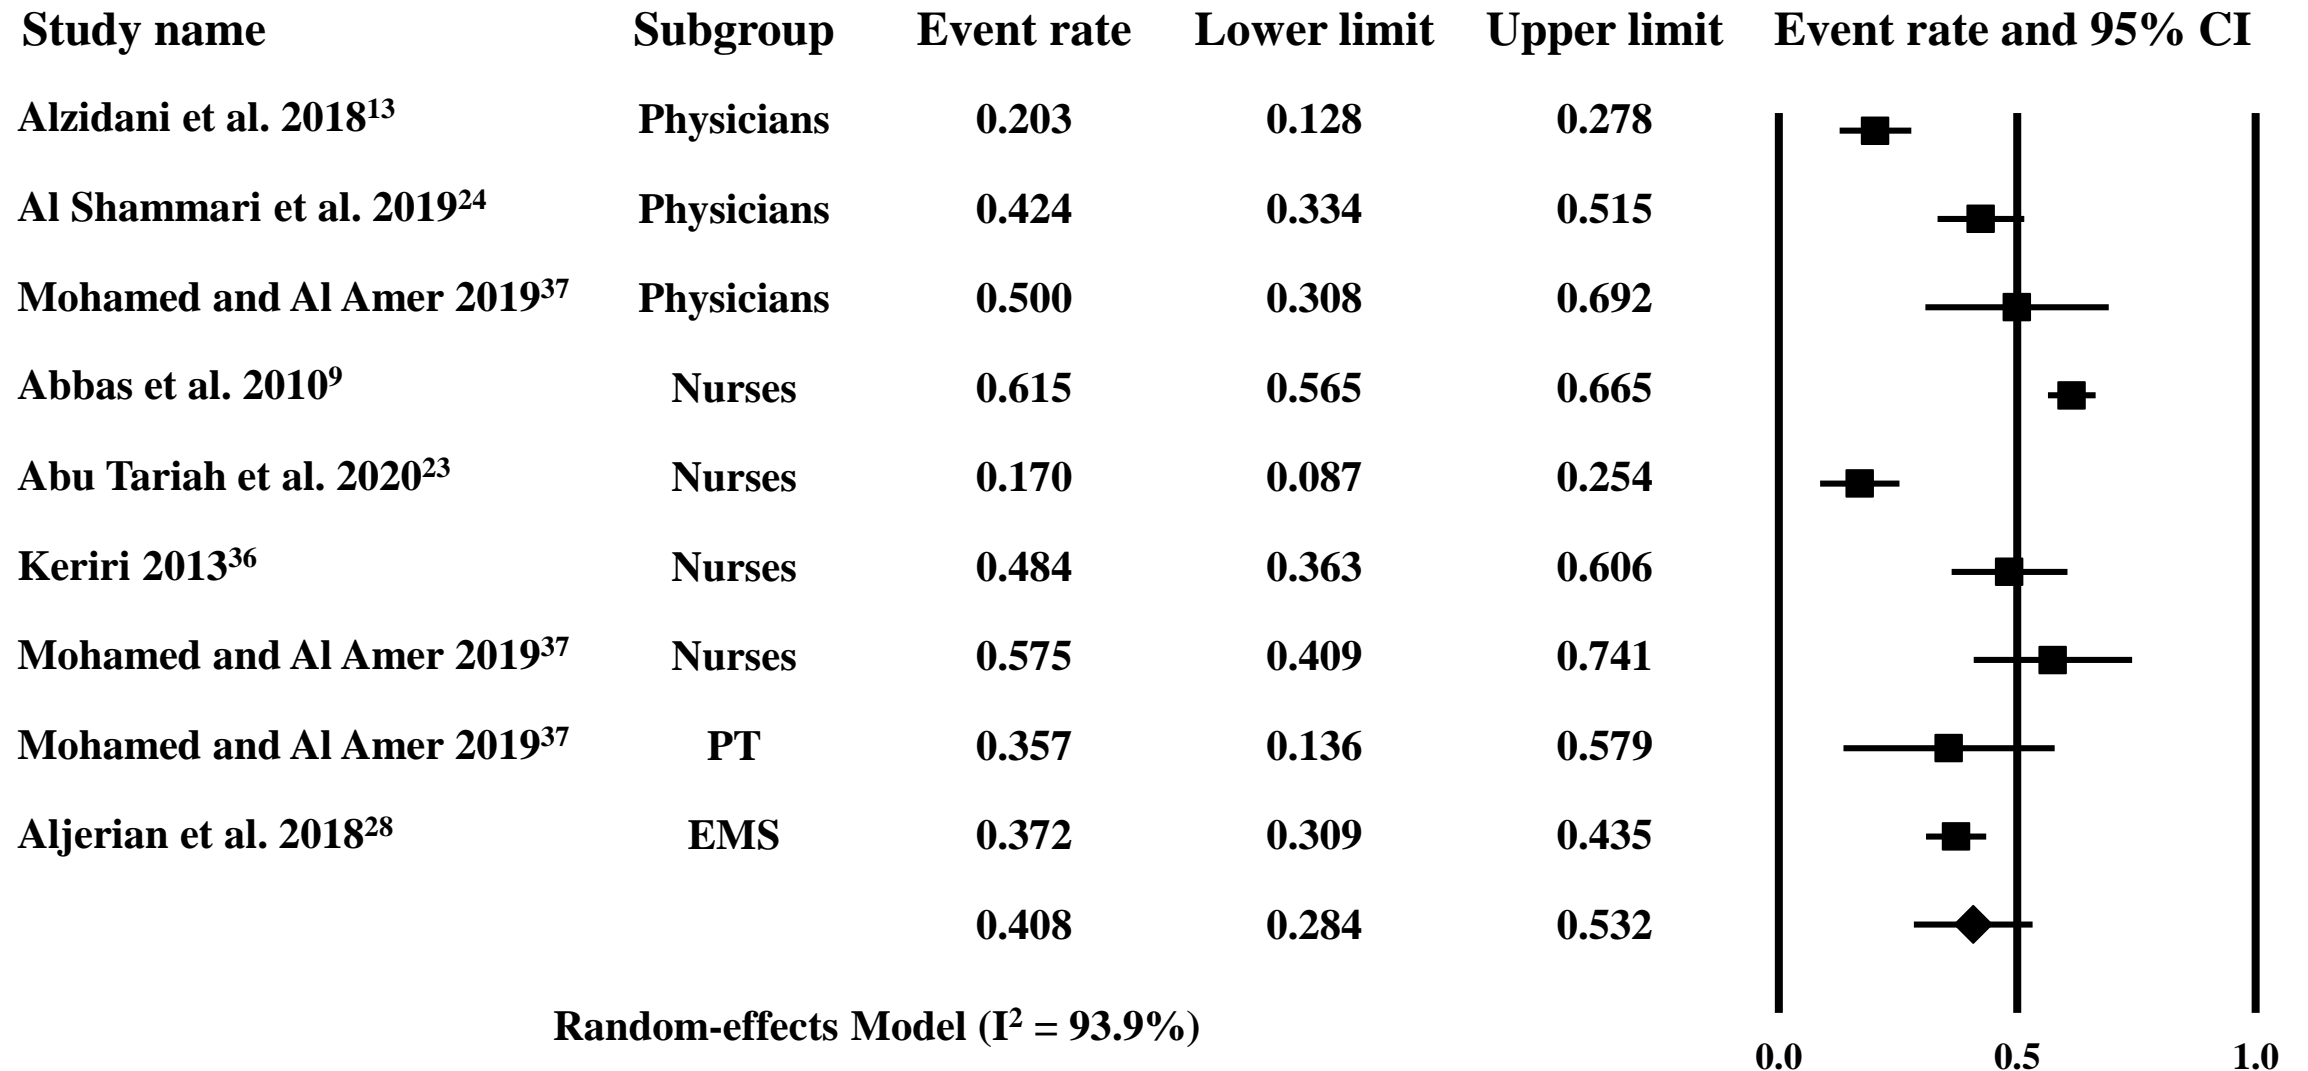

Abbreviations: CI, confidence interval; PT, physical therapists; EMS, emergency medical service.

**Supplemental Figure 2.** Year prevalence of low back pain among health professionals in Saudi Arabia

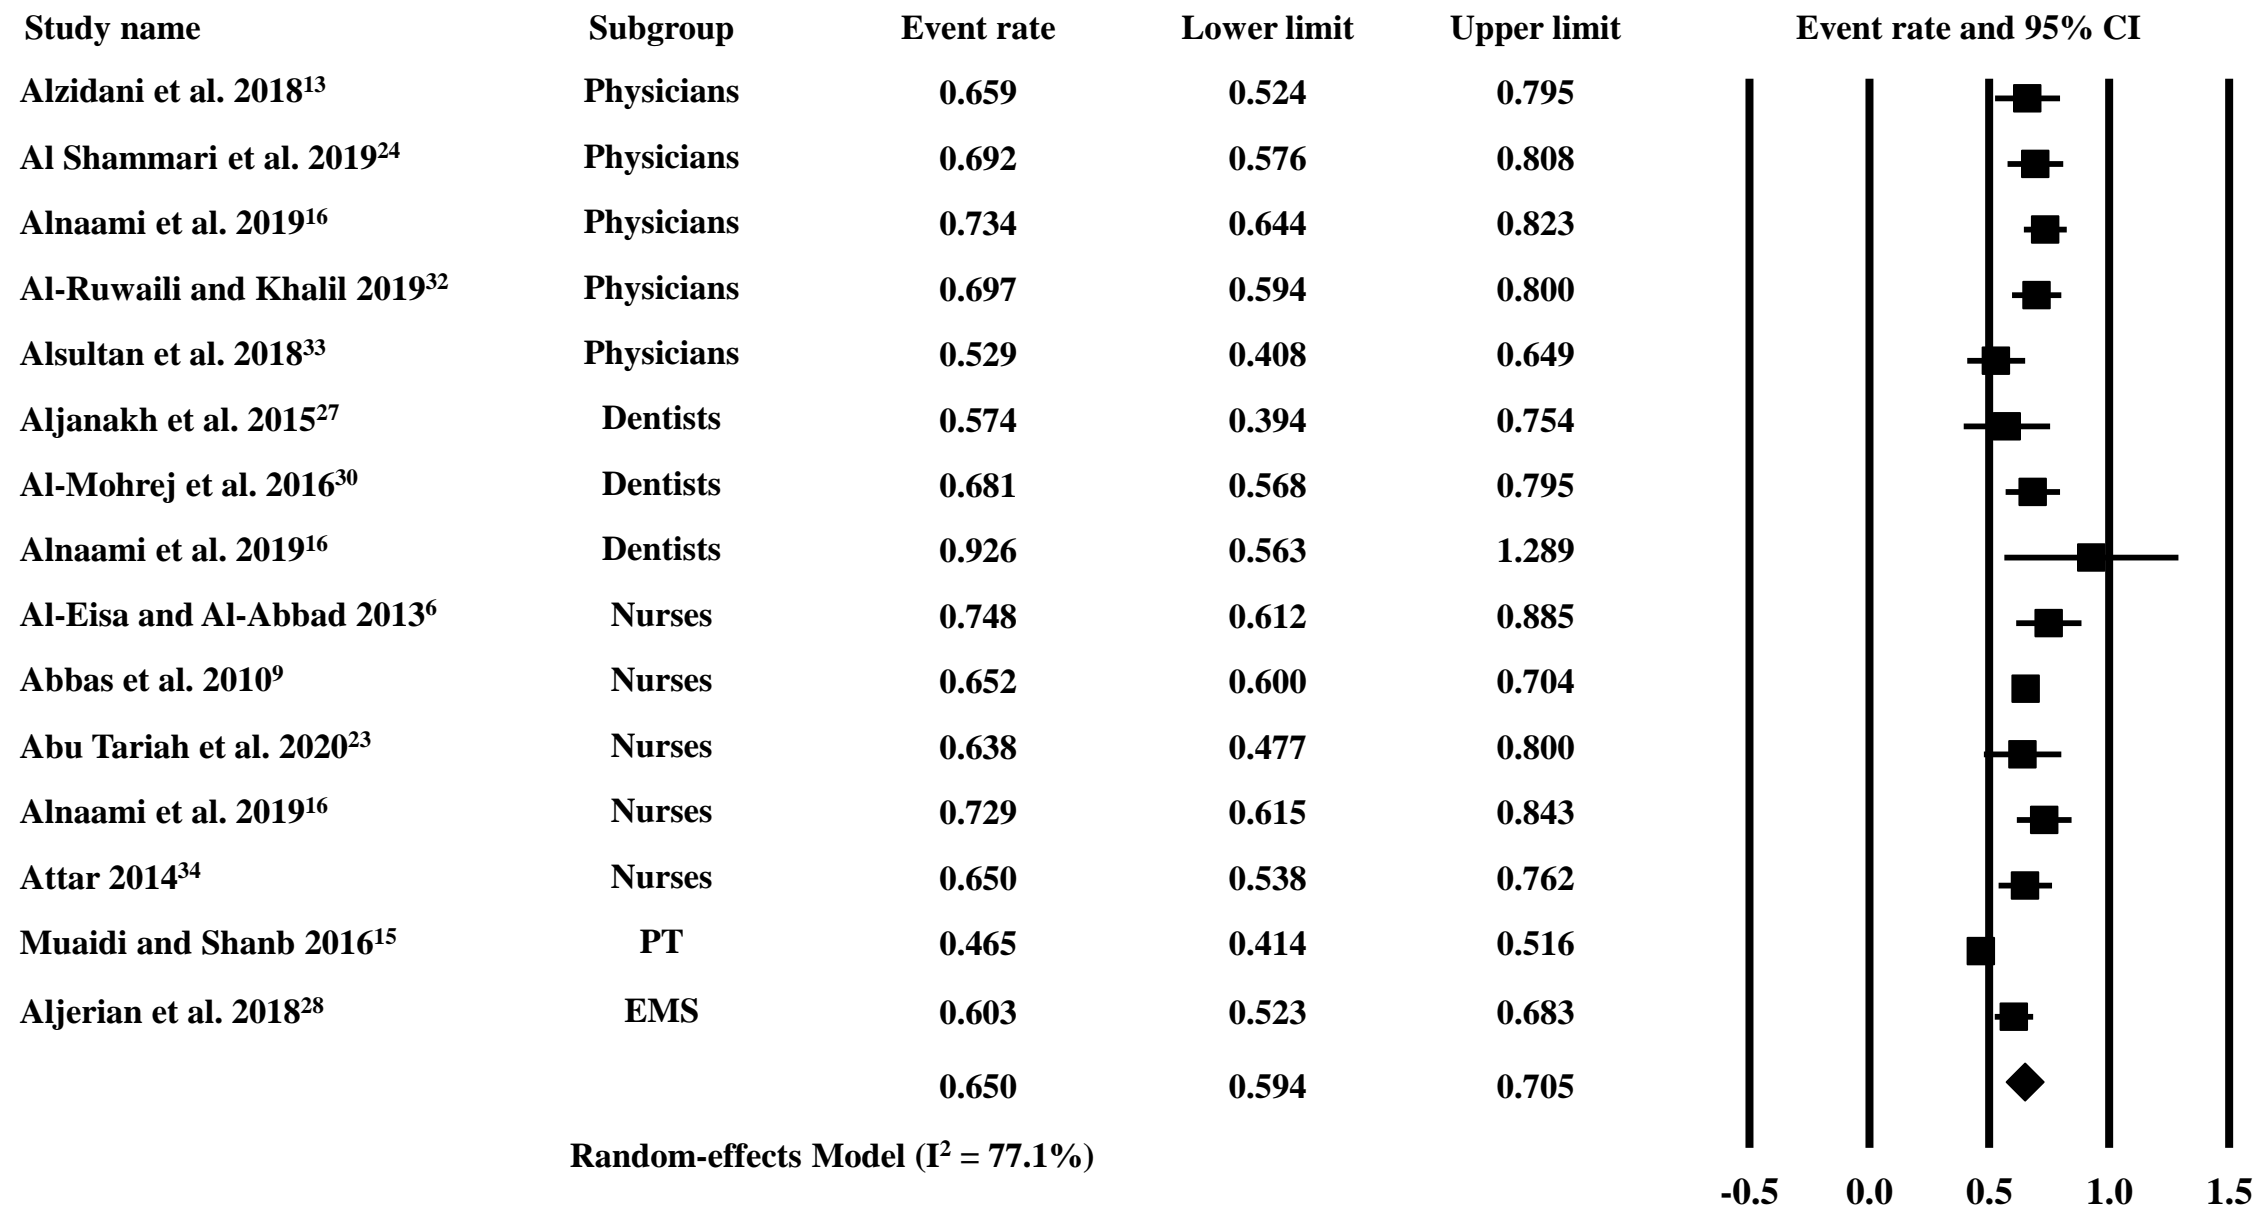

Abbreviations: CI, confidence interval; PT, physical therapists; EMS, emergency medical service.

**Supplemental Figure 3.** Career prevalence of low back pain among health professionals in Saudi Arabia

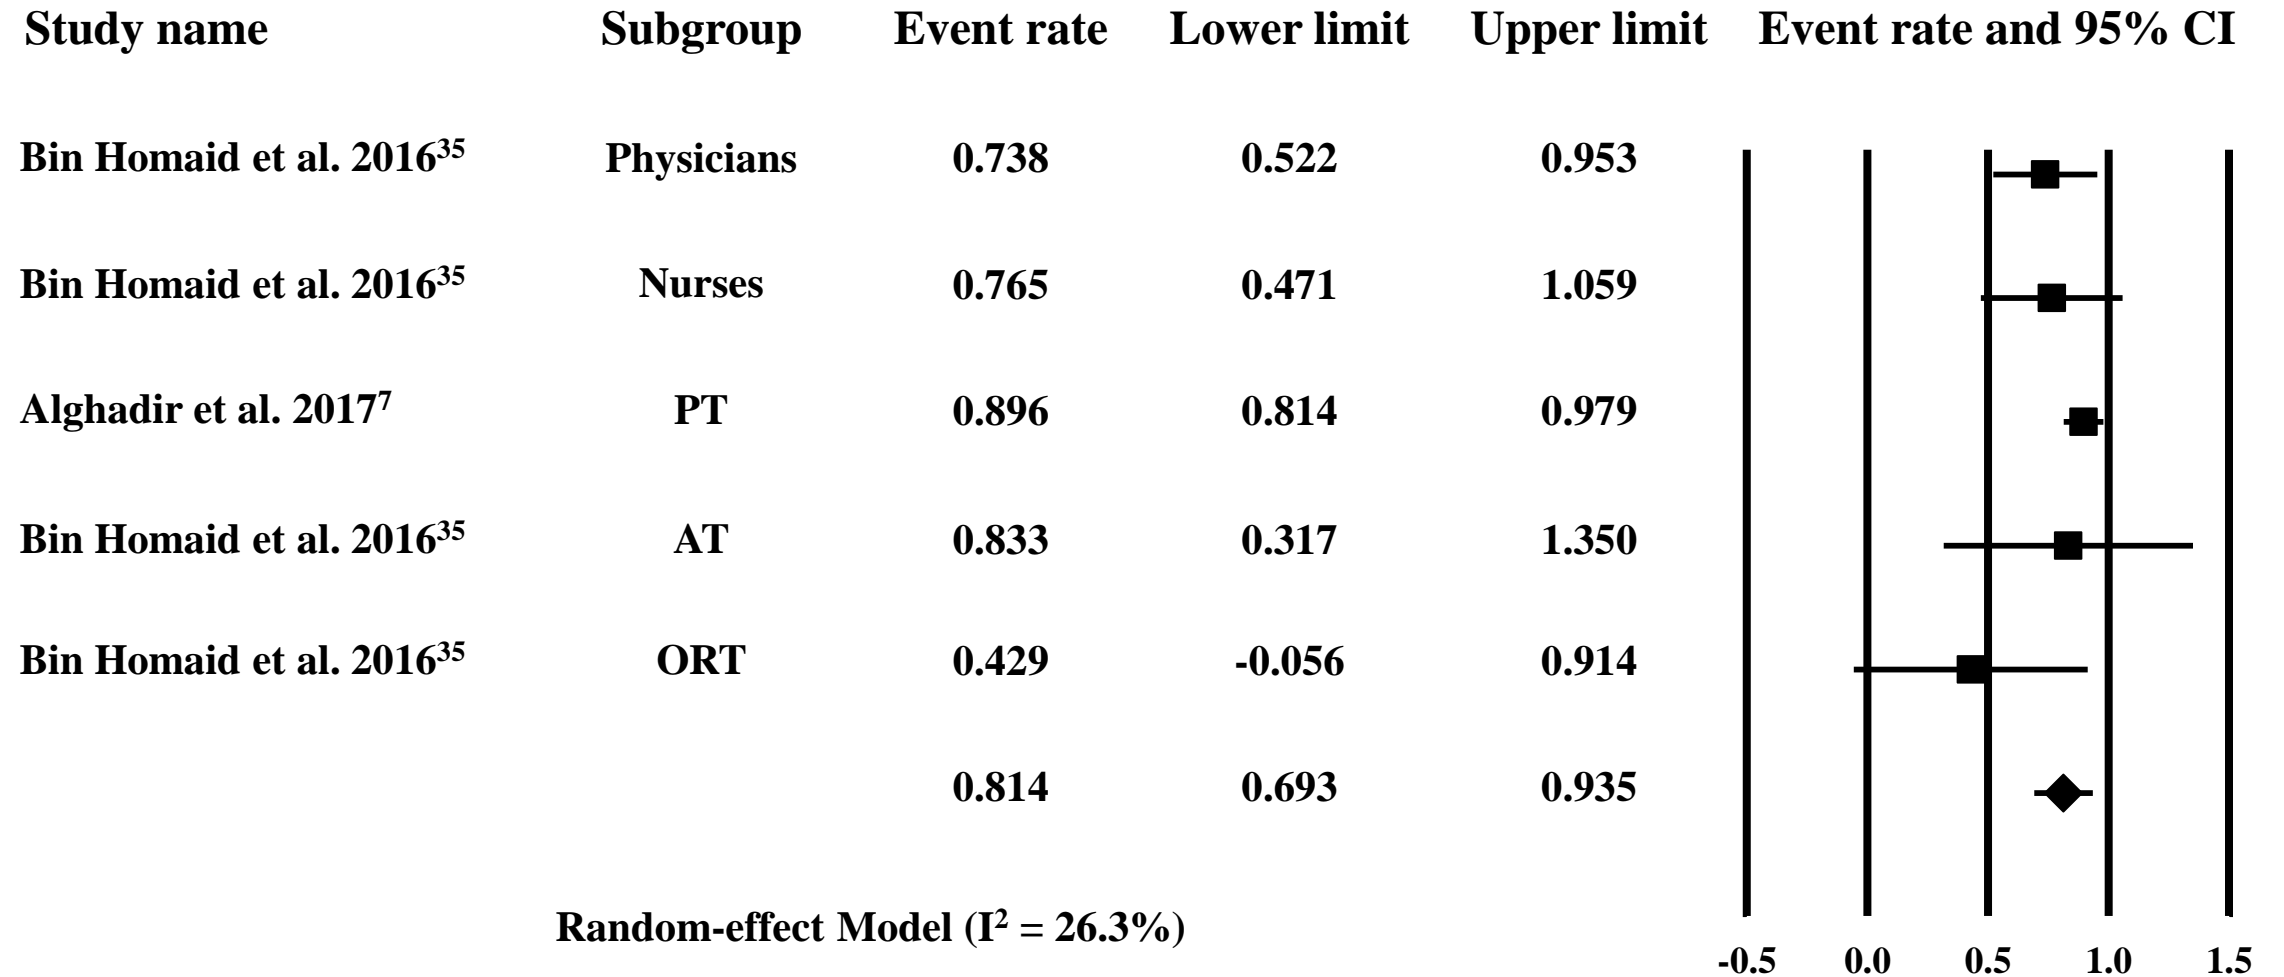

Abbreviations: CI, confidence interval; PT, physical therapists; AT, anesthesia technicians; ORT, operation room technicians.

**Supplemental Figure 4.** Week prevalence of low back pain among physicians in Saudi Arabia

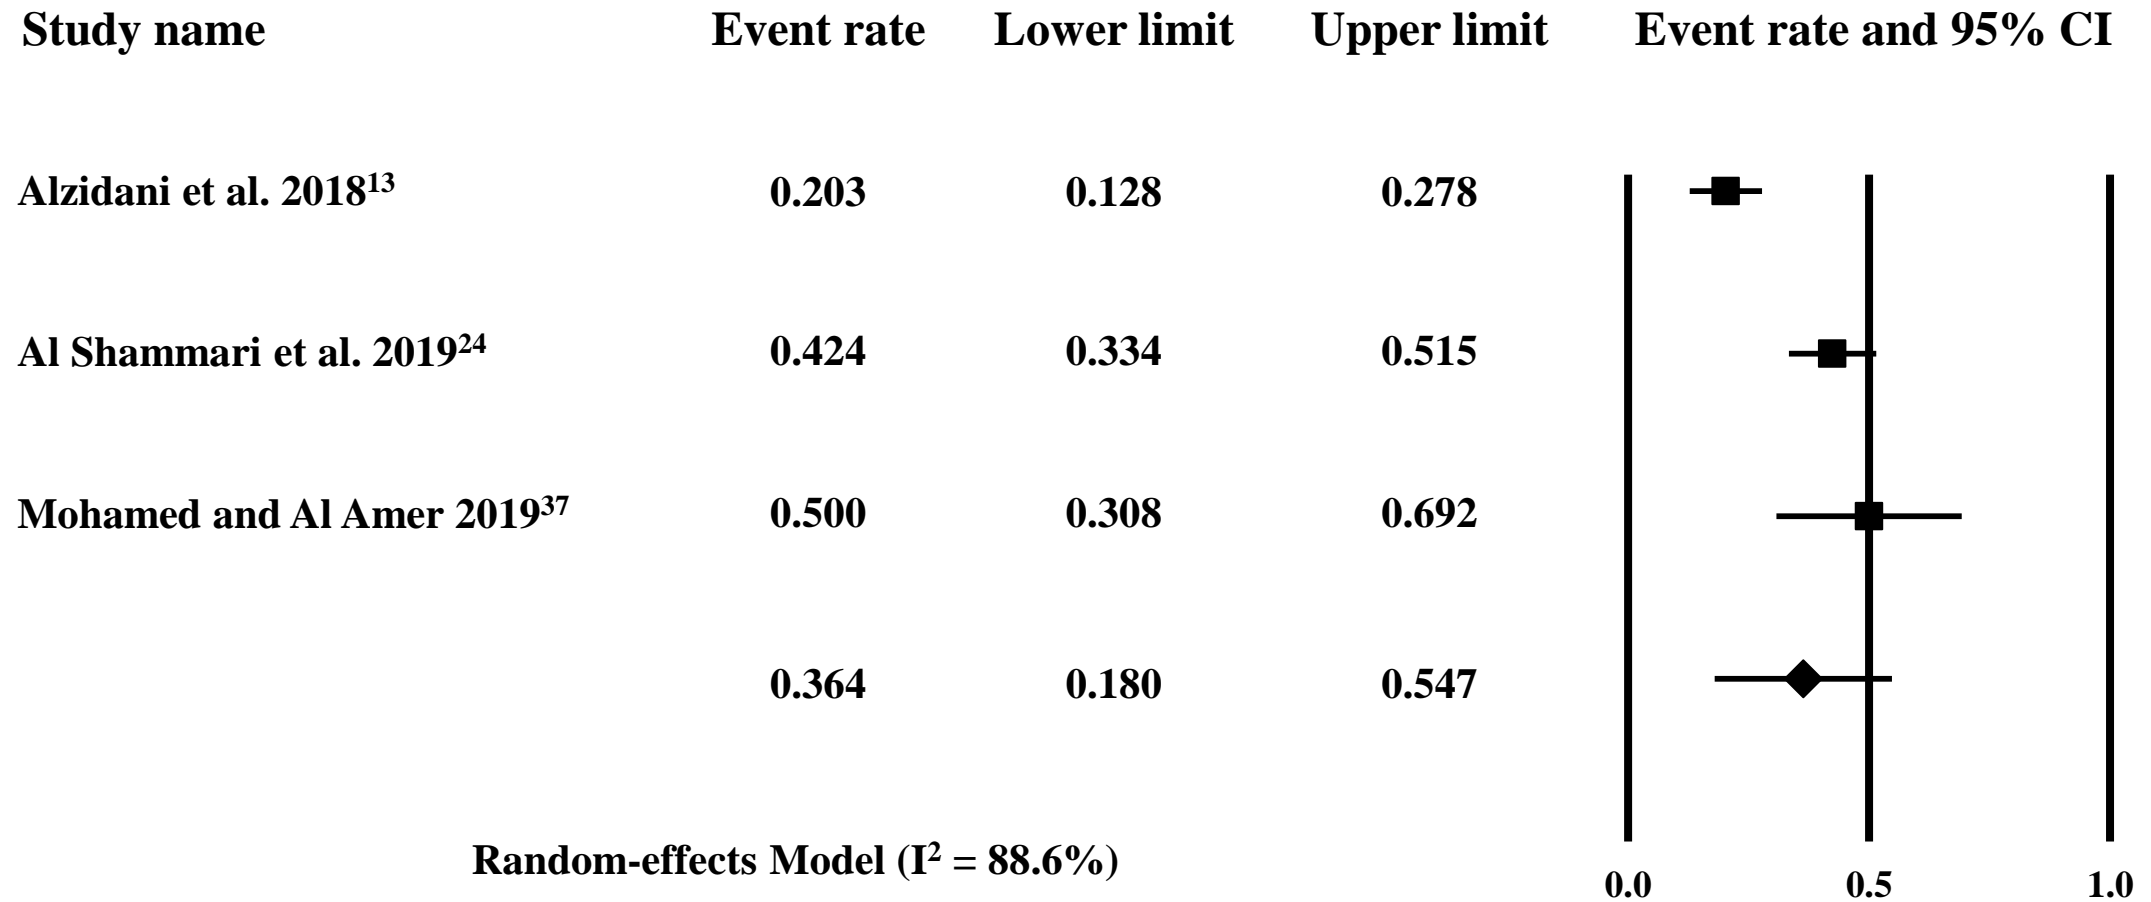

Abbreviations: CI, confidence interval.

**Supplemental Figure 5.** Year prevalence of low back pain among physicians in Saudi Arabia

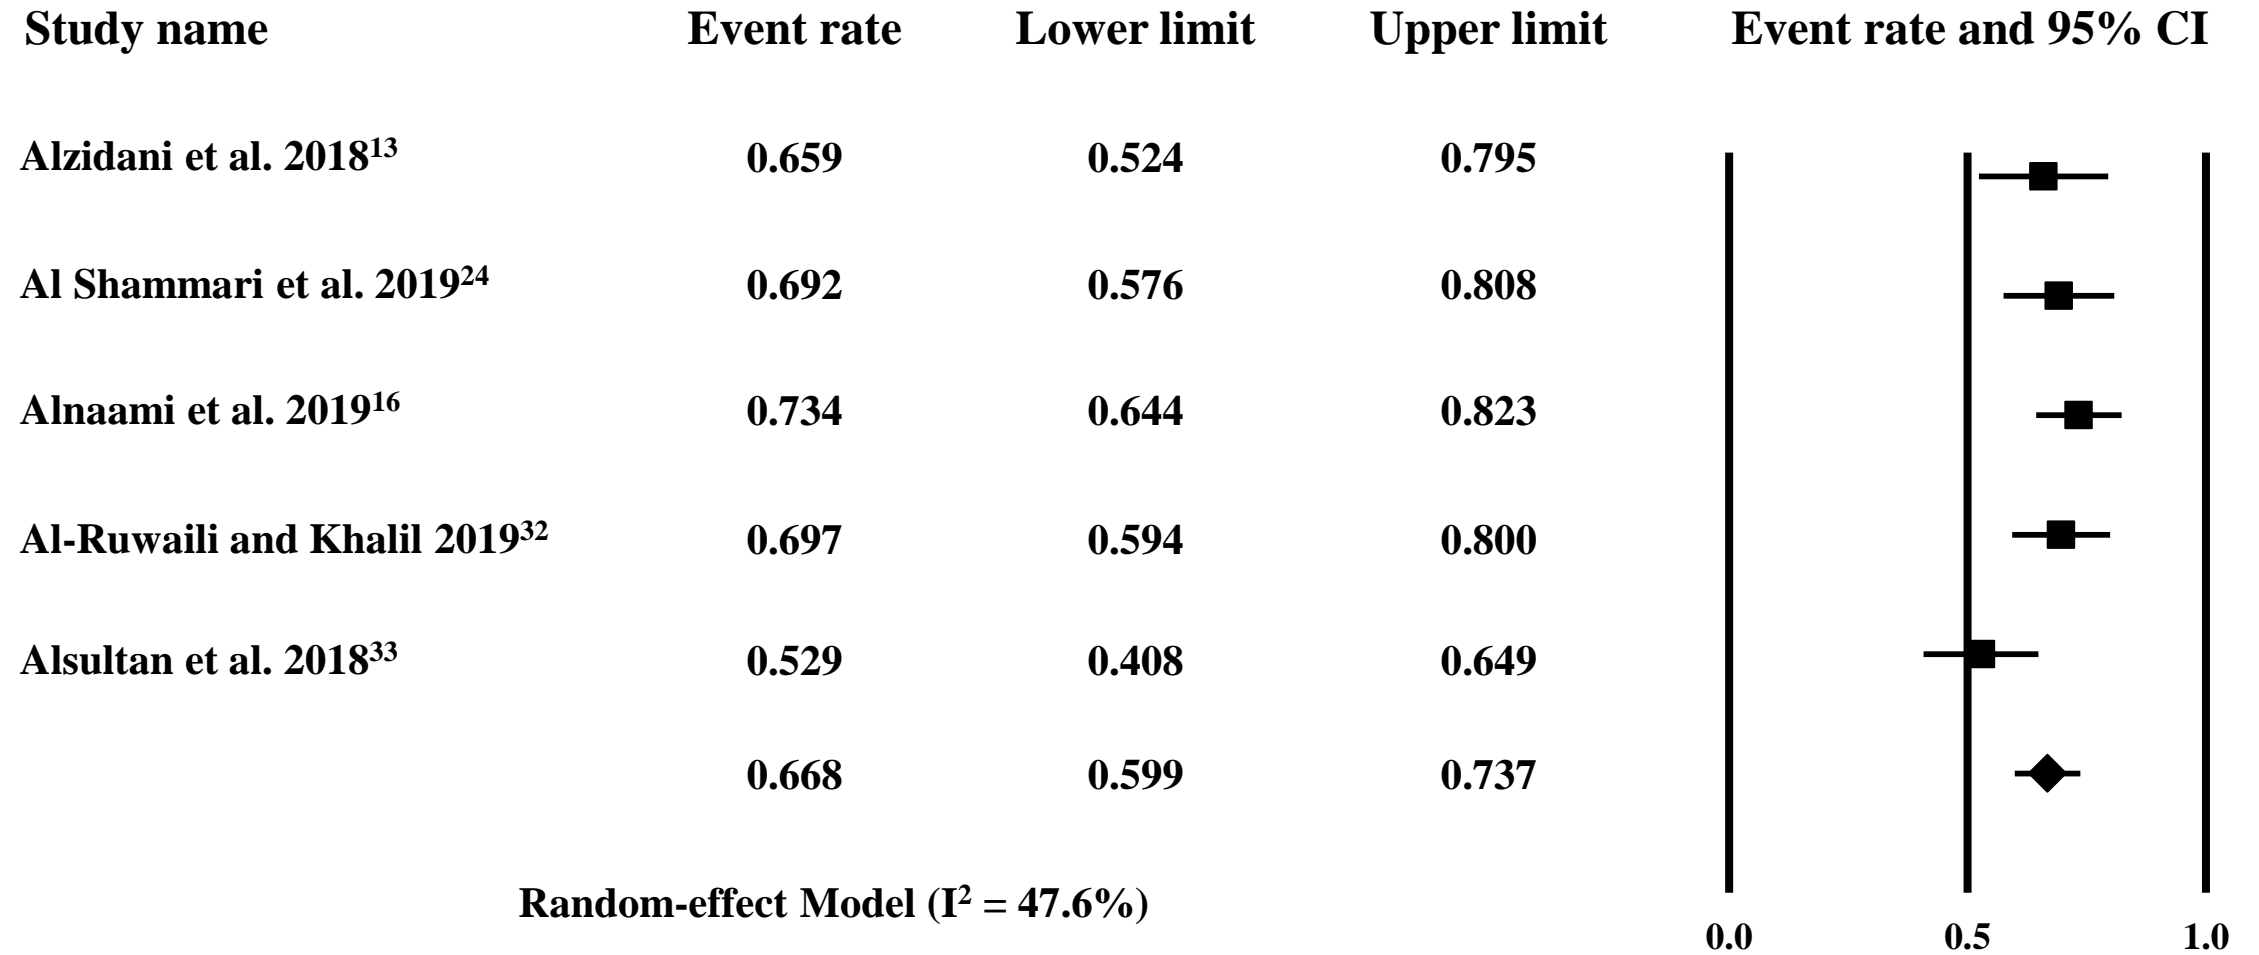

Abbreviations: CI, confidence interval.

**Supplemental Figure 6.** Lifetime prevalence of low back pain among physicians in Saudi Arabia

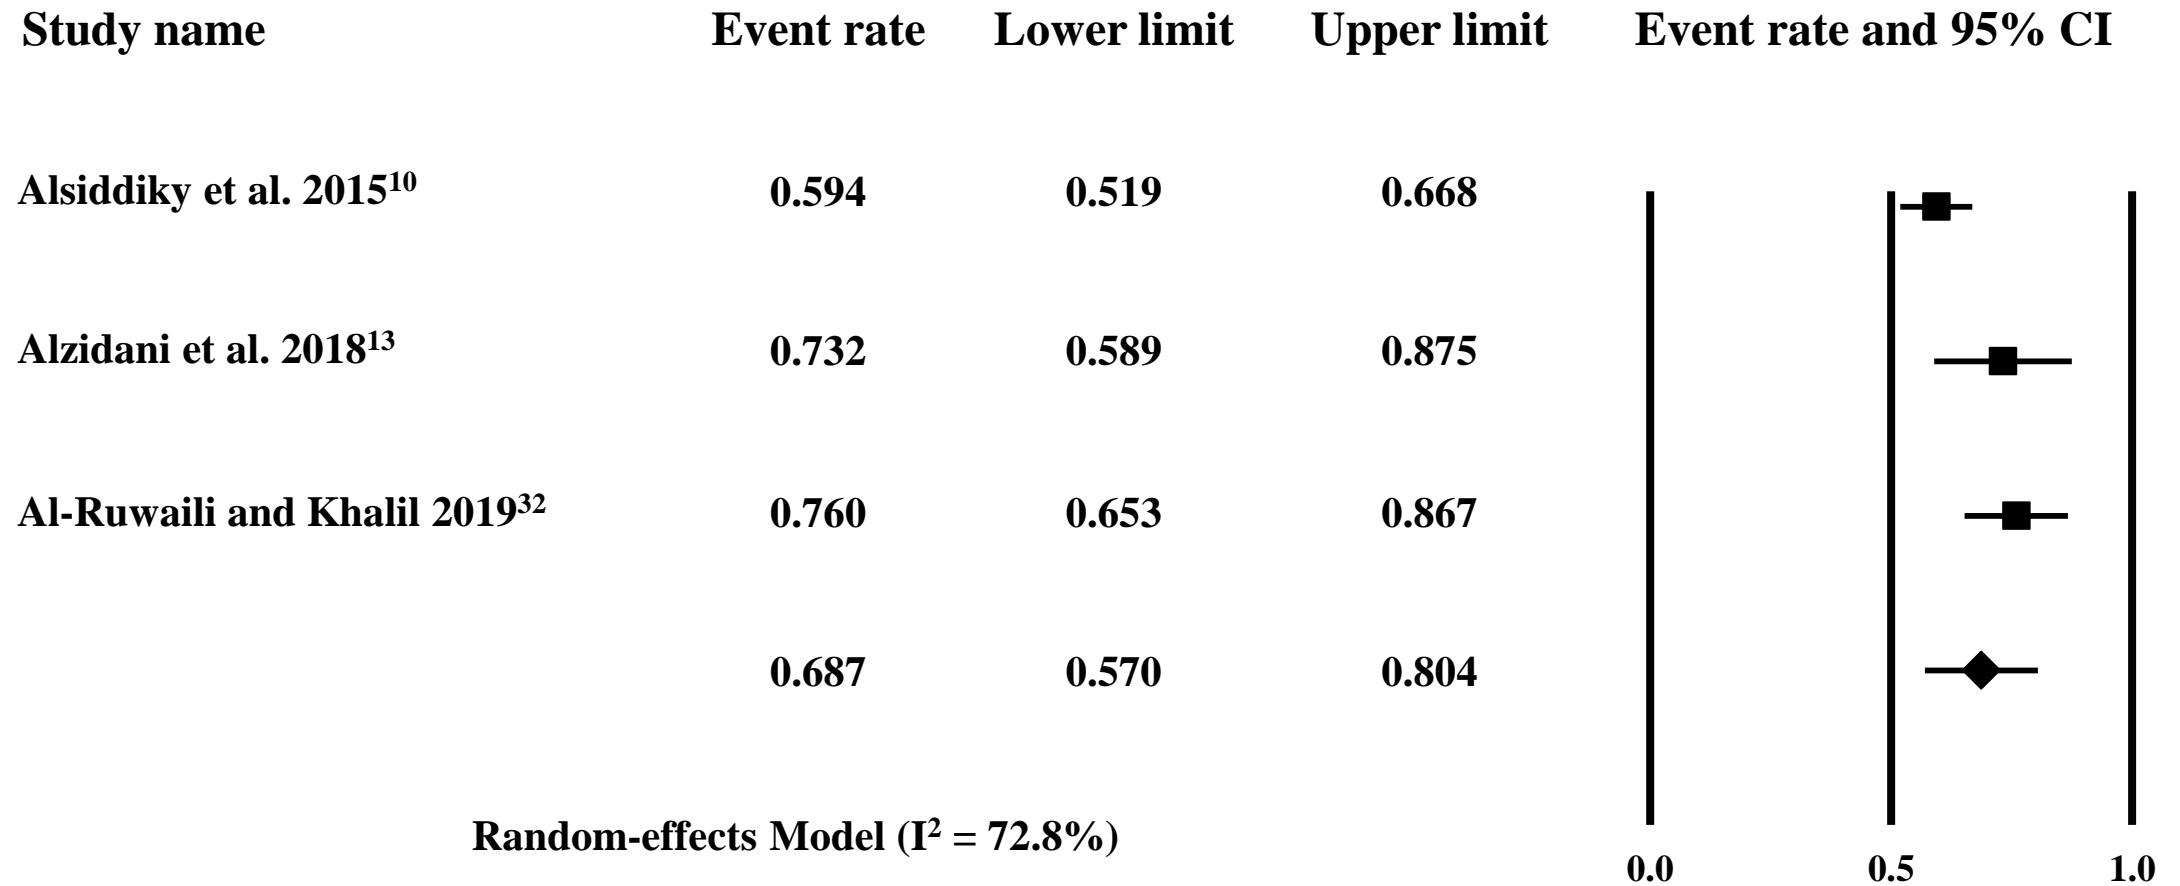

Abbreviations: CI, confidence interval.

**Supplemental Figure 7.** Year prevalence of low back pain among dentists in Saudi Arabia

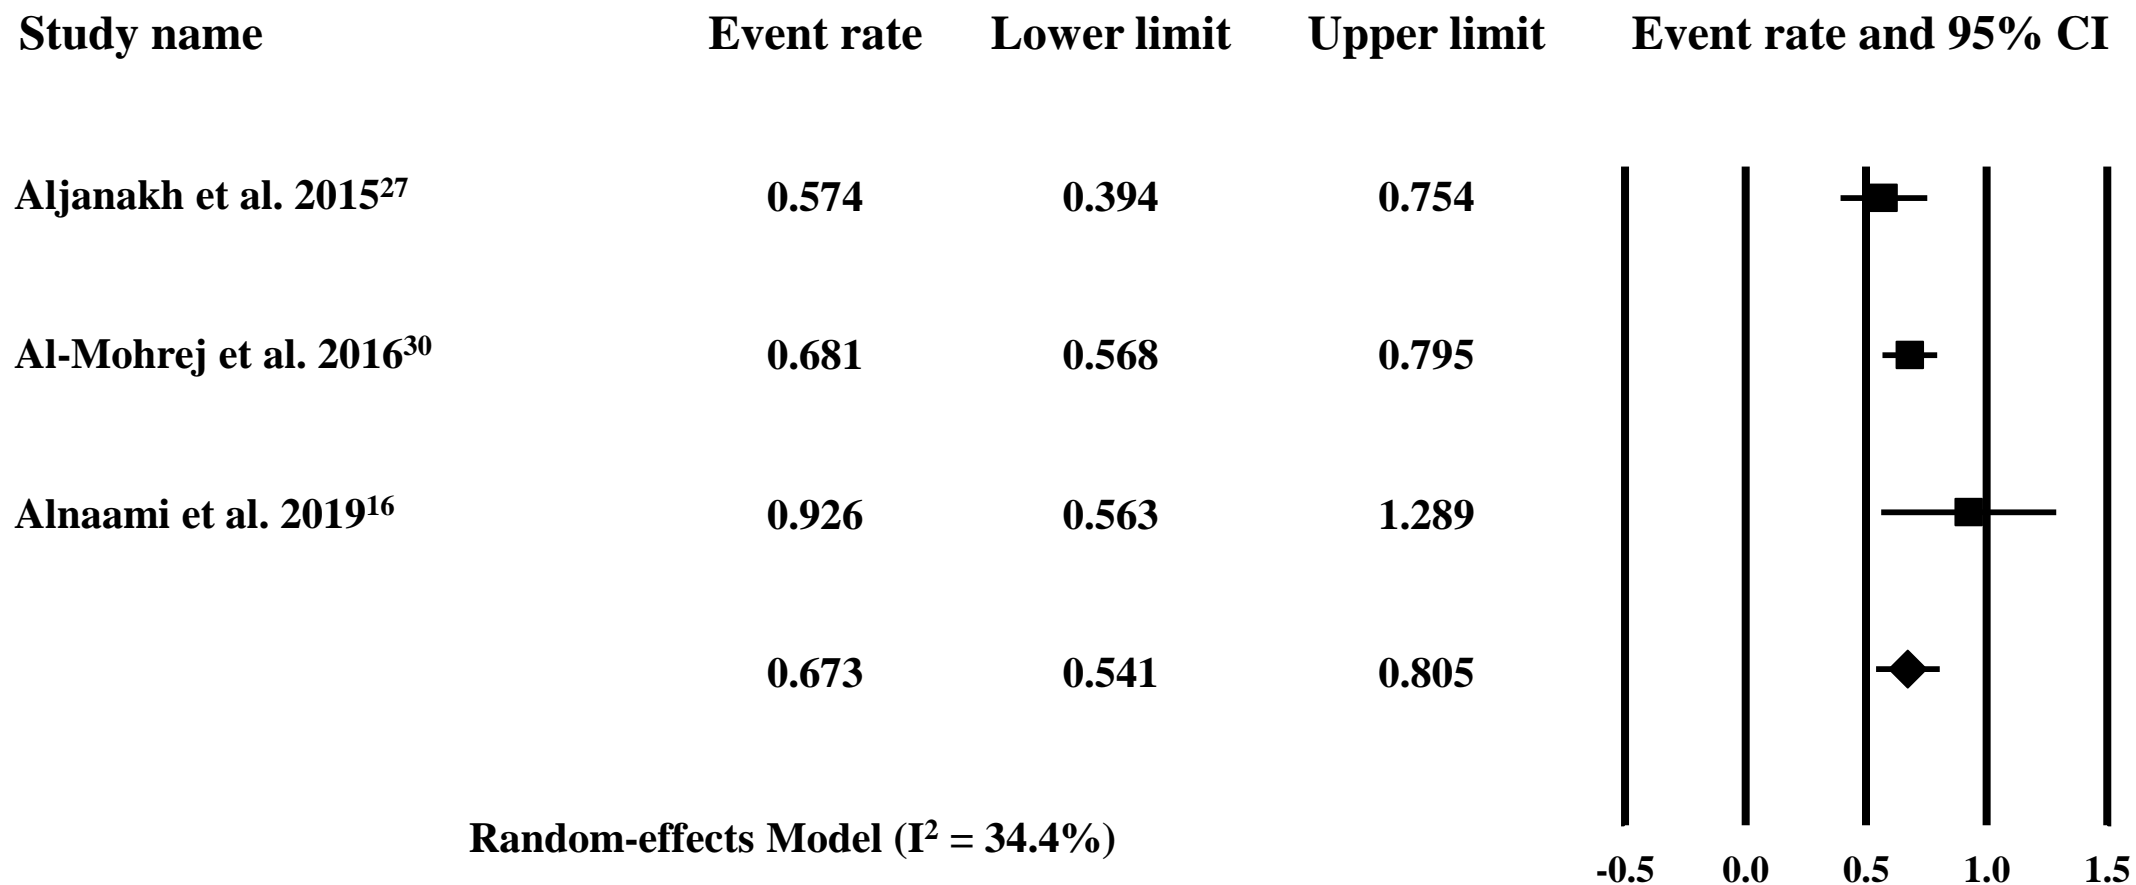

Abbreviations: CI, confidence interval.

**Supplemental Figure 8.** Week prevalence of low back pain among nurses in Saudi Arabia

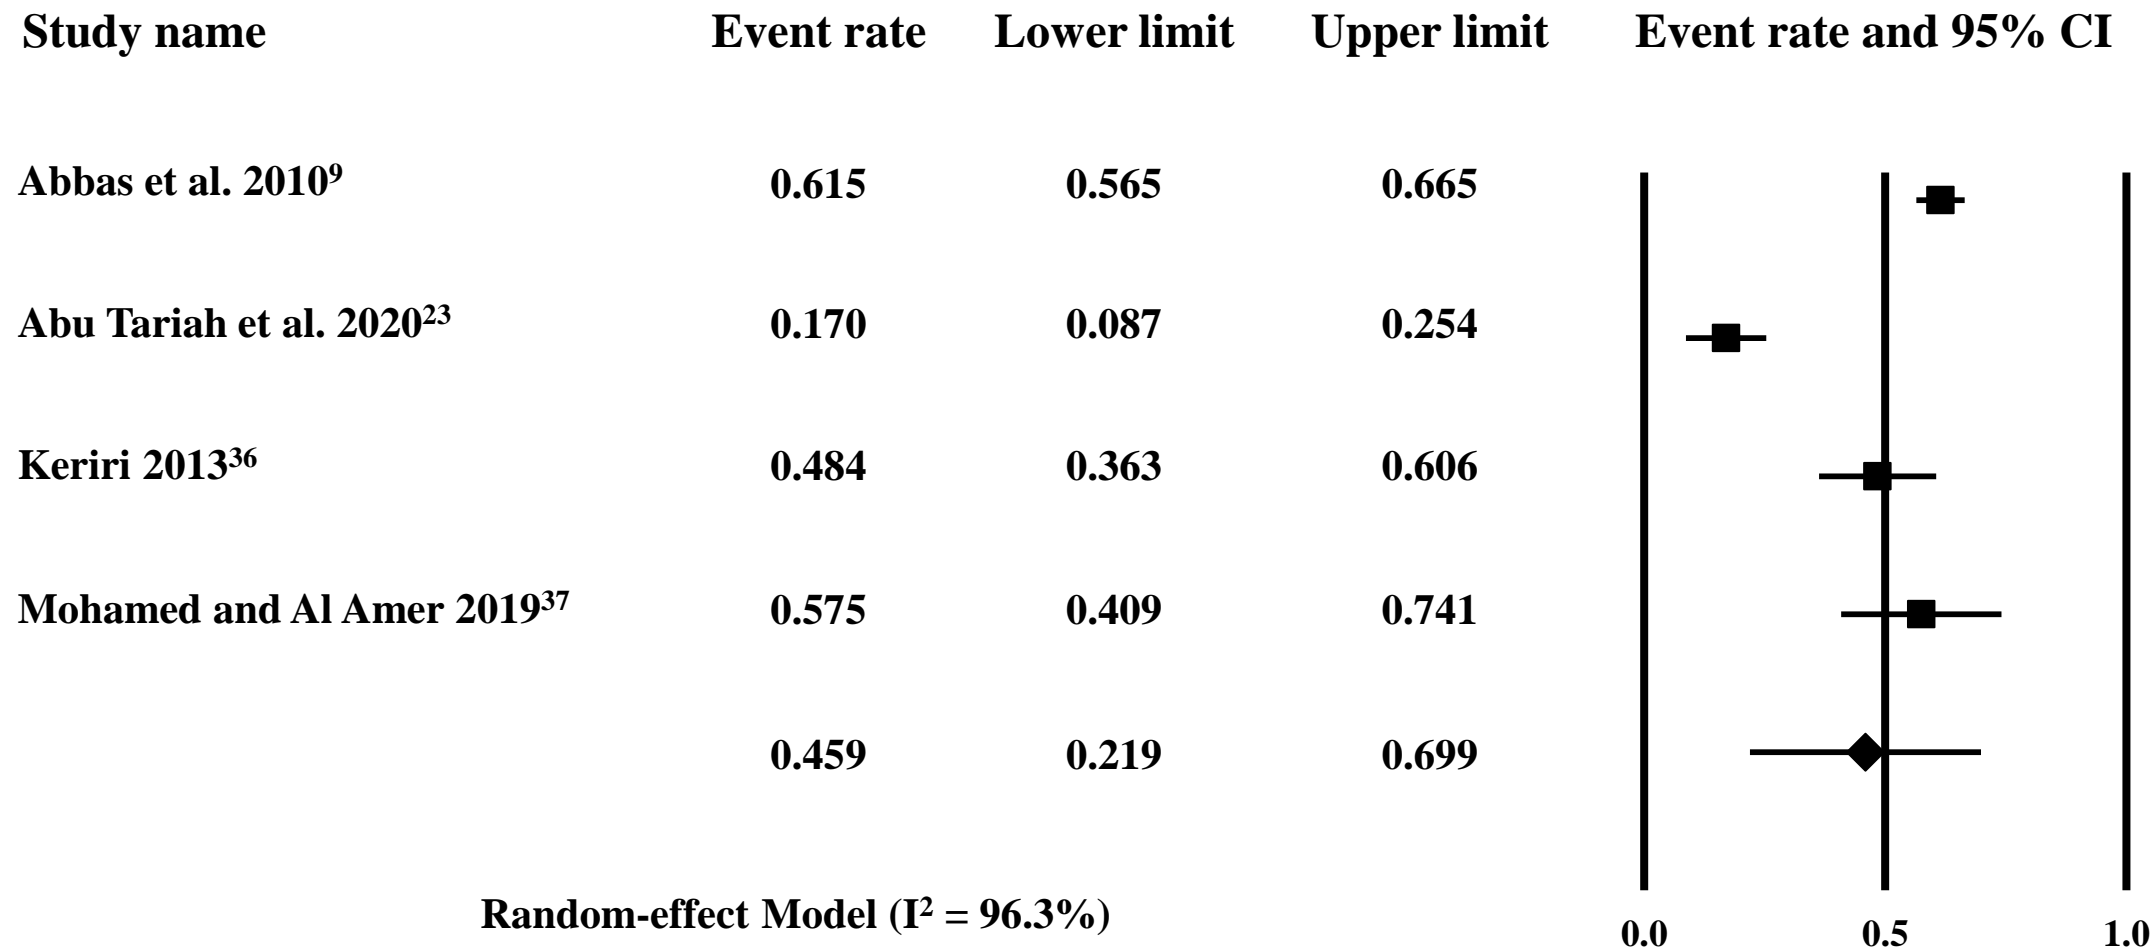

Abbreviations: CI, confidence interval.



**Supplemental Figure 9.** Year prevalence of low back pain among nurses in Saudi Arabia

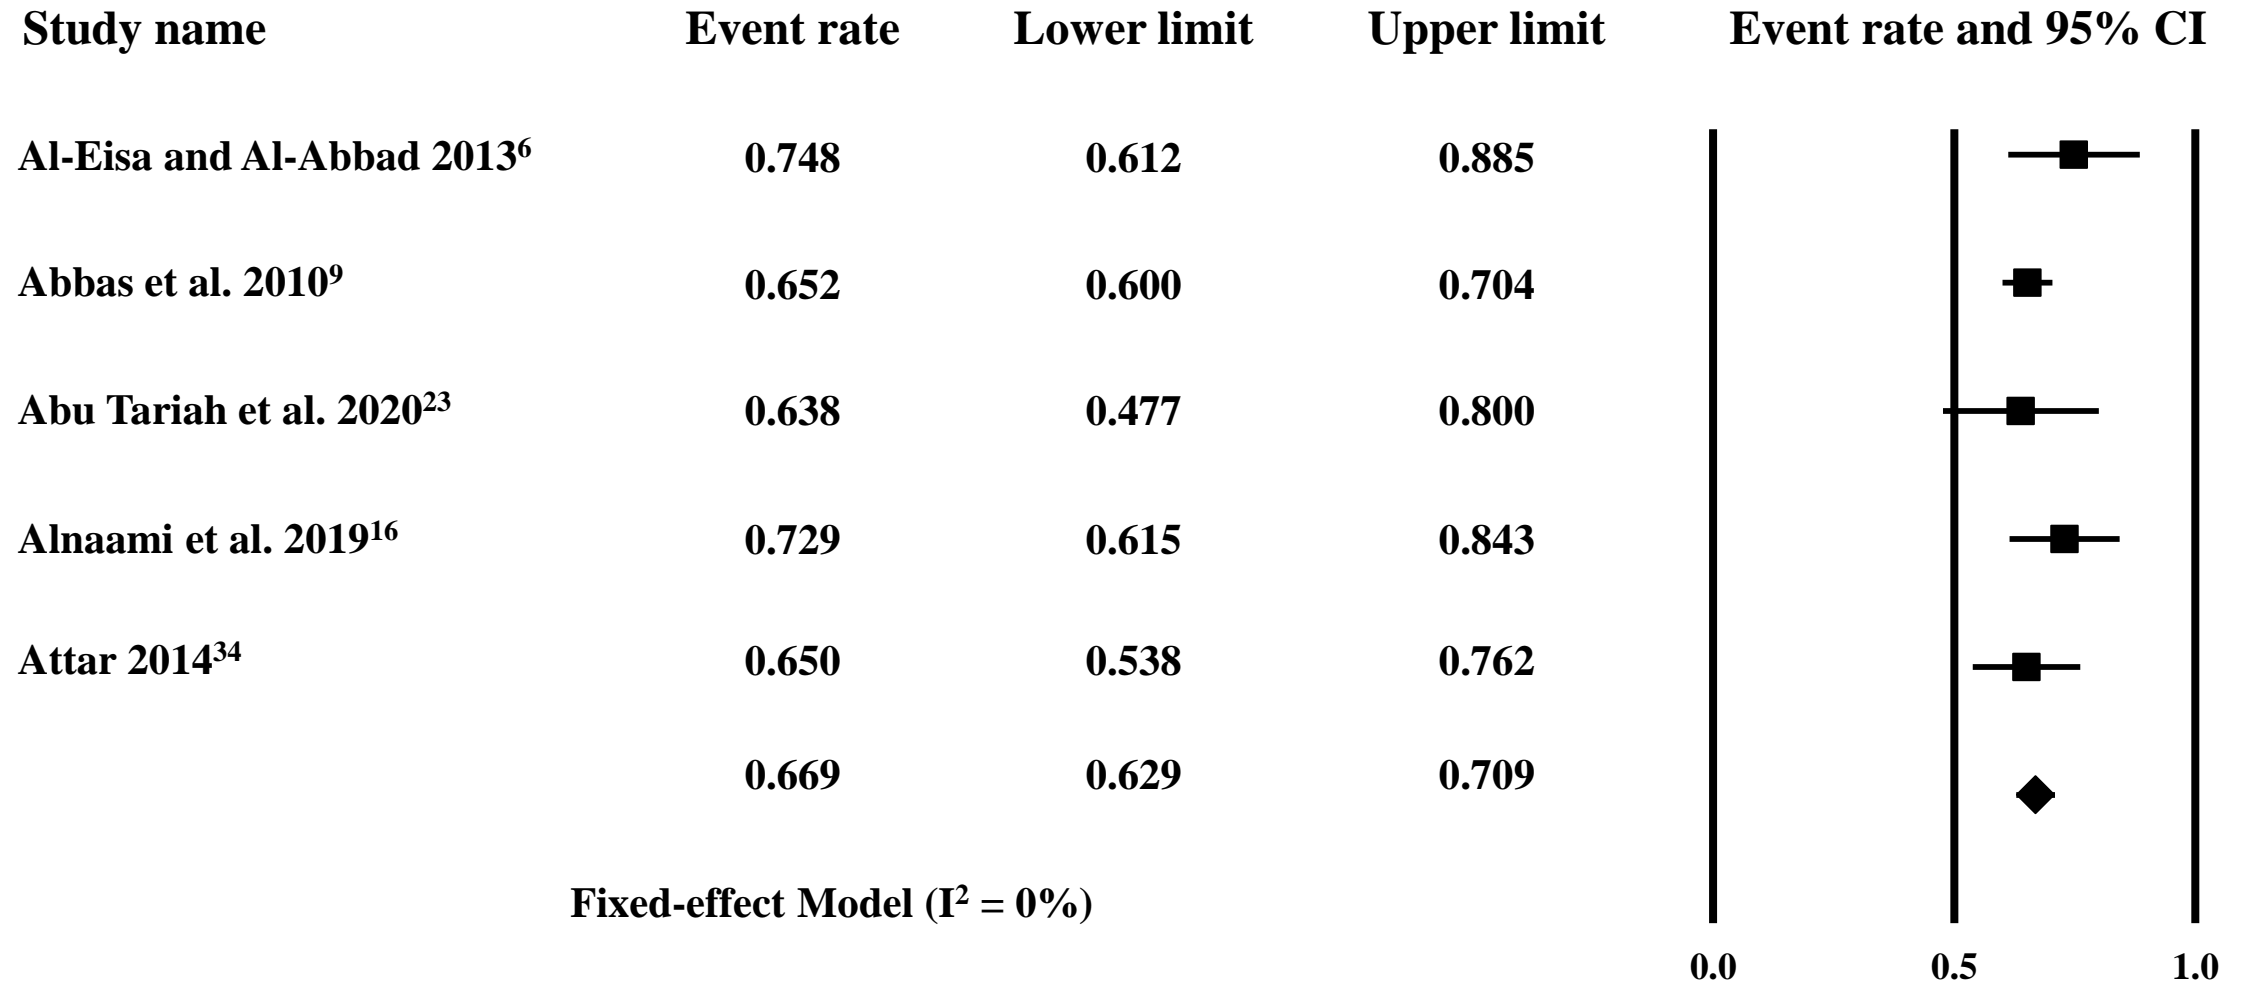

Abbreviations: CI, confidence interval.
