# Supplementary material for: Low back pain prevalence and risk factors among health workers in Saudi Arabia: A systematic review and meta‐analysis
Source: PubMed Central journal article supplement (PMC7382437; doi:10.1002/1348-9585.12155), 2020-07-25
Supplement: JOH2-62-e12155-s002.pdf [file JOH2-62-e12155-s002.pdf]

**Supplemental Table 1.** Prevalence rates of low back pain from studies with high risk of bias

| Study                                     | Occupation                        | Prevalence period and rate |       |        |          |
|-------------------------------------------|-----------------------------------|----------------------------|-------|--------|----------|
|                                           |                                   | Week                       | Year  | Career | Lifetime |
| Al Dajah and Al Daghdhi 2013 <sup>8</sup> | Nurses                            | 61.3%                      | -     | -      | -        |
| Aseri et al. 2019 <sup>14</sup>           | Physicians                        | -                          | -     | 69%    | 84.9%    |
| Abduljabbar 2008 <sup>22</sup>            | Dentists                          | -                          | 52.1% | -      | -        |
| Alamri et al. 2018 <sup>25</sup>          | Physicians                        | -                          | -     | -      | 47.8%    |
| Alghadir et al. 2015 <sup>26</sup>        | Dental professionals <sup>a</sup> | -                          | -     | 50.6%  | -        |
| Almalki et al. 2016 <sup>29</sup>         | Physicians                        | -                          | -     | -      | 87.7%    |
| AlNekhlan et al. 2020 <sup>31</sup>       | MLT                               | -                          | 60.9% | -      | -        |
| Gaowgzeh 2019 <sup>38</sup>               | Nurses                            | -                          | -     | 66.7%  | -        |

<sup>a</sup>Include dentists, dental assistants, dental hygienists, and dental technicians.

Abbreviations: MLT, medical laboratory technologists.
